# Supplementary material for: Towards predictive control of reversible nanoparticle assembly with solid-binding proteins
Source: Royal Society of Chemistry journal article supplement (doi:10.1039/d4sm00094c), 2024-01-01
Supplement: d4sm00094c1.pdf [file d4sm00094c1.pdf]

# Supporting Information

## **Towards Predictive Control of Reversible Nanoparticle Assembly with Solid-Binding Proteins**

Yifeng Cai,<sup>a</sup> Xin Qi,<sup>a</sup> Julia Boese,<sup>a</sup> Yundi Zhao,<sup>a</sup> Brittney Hellner,<sup>a</sup> Jaehun Chun,<sup>b,c</sup>  
Christopher J. Mundy,<sup>a,b</sup> and François Baneyx\*<sup>a</sup>

<sup>a</sup>Department of Chemical Engineering, University of Washington, Seattle, Washington 98195, United States. <sup>b</sup>Physical and Computational Sciences Directorate, Pacific Northwest National Laboratory, Richland, Washington 99354, United States. <sup>c</sup>Levich Institute and Department of Chemical Engineering, CUNY City College of New York, New York, New York 10031, United States

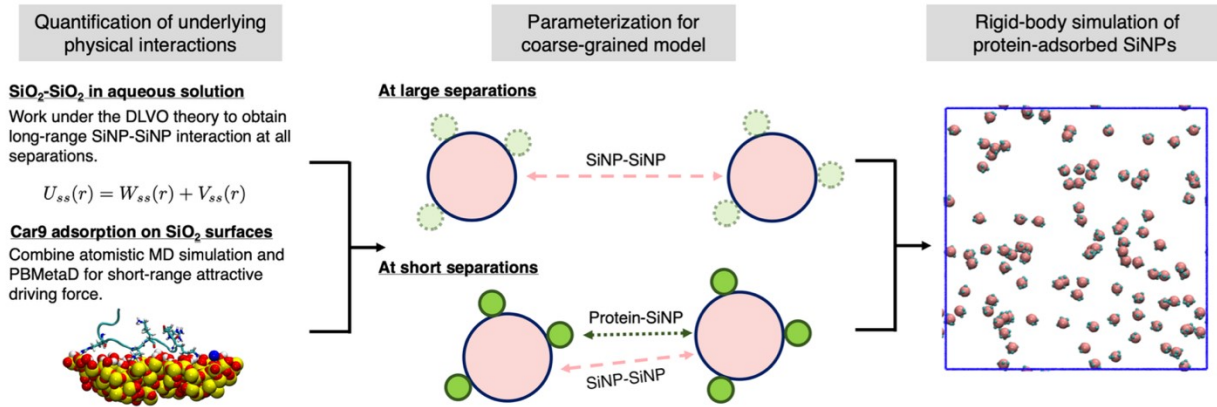

**Fig. S1** Our multiscale simulation framework combines top-down and bottom-up approaches to model the assembled state of silica nanoparticles by bifunctional solid-binding proteins. See ref. [1] for details.

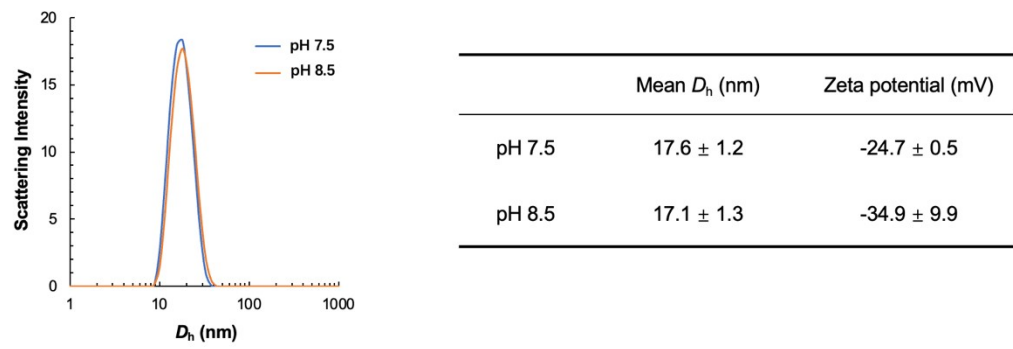

**Fig. S2** Size distributions and zeta potentials of bare SiNP at pH 7.5 and pH 8.5.

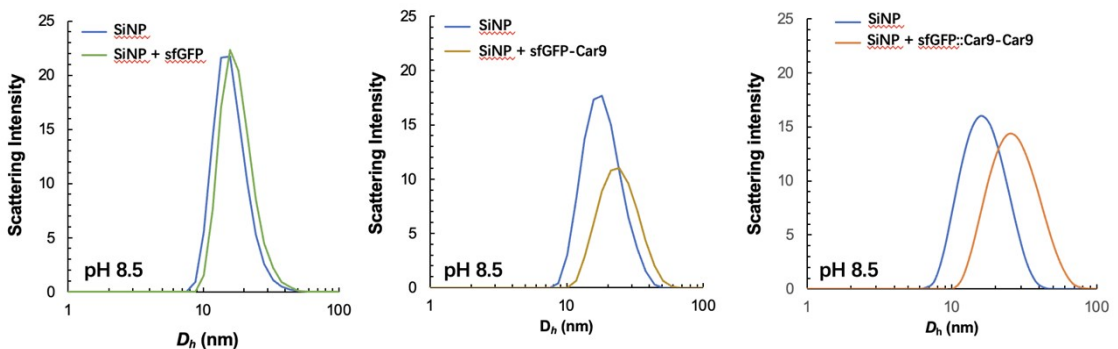

**Fig. S3** Size distribution of bare SiNP at pH 8.5 (blue curves) and in the presence of a 5:1 molar excess of wild type sfGFP (gold curve, center panel) or sfGFP::Car9-Car9 (orange curve). The  $D_h$  progressively increases from about 17 nm for bare SiNPs, to 24 nm for SiNPs decorated with a sfGFP-Car9 shell, to about 28 nm for SiNPs decorated with the sfGFP::Car9-Car9 bifunctional protein.

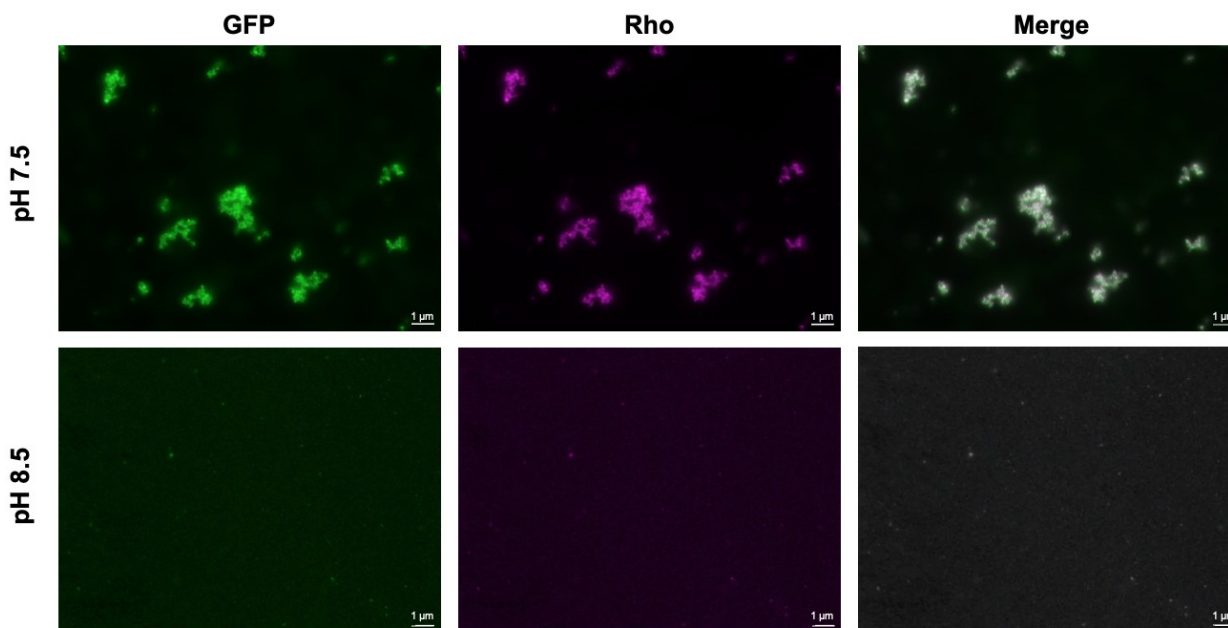

**Fig. S4** Fluorescence microscopy images of the self-assembled clusters obtained at pH 7.5 (top), and of the dispersed, protein-bound SiNP obtained by shifting the pH to 8.5 (bottom). sfGFP::Car9-Car9 was mixed with SiNP at a 5:1 molar equivalent ratio and images were acquired at the indicated pH in the GFP (sfGFP fluorescence, left panels) and Rhodamine (rhodamine molecules encapsulated within the SiNPs, middle panels) channels of the microscope. Artificially colored images were merged (right panels) to demonstrate colocalization.

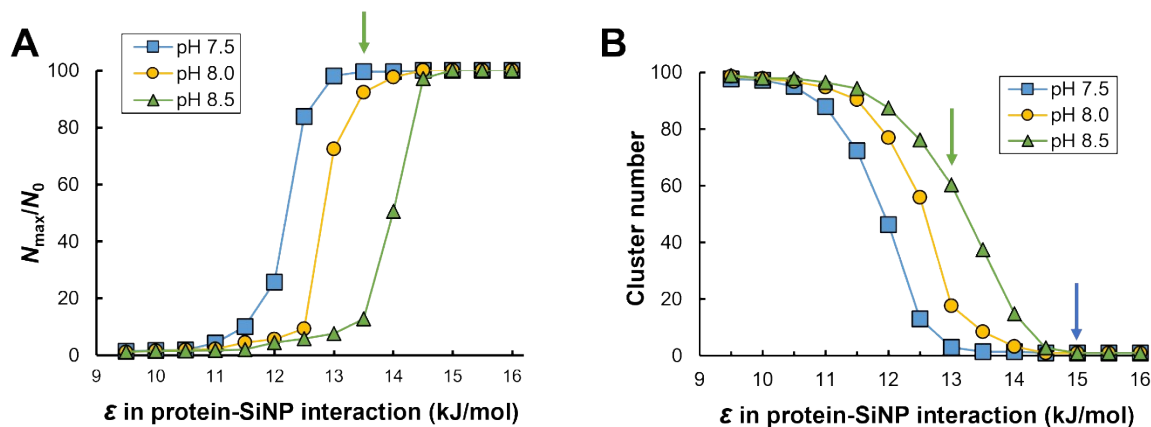

**Fig. S5 (A)** Evolution of the assembled state  $N_{max}/N_0$  with the depth of the protein-SiNP attractive potential. Rigid body simulations were conducted at a 5:1 molar equivalent of sfGFP::Car9-Car9 to 10 nm SiNPs and at the indicated pH. Data at pH 7.5 and pH 8.5 is taken from Fig. 4 in reference 1. **(B)** Number of clusters present in the last 500 frames of each simulation as a function of  $\epsilon$ . The green and blue arrows indicate the precise value of  $\epsilon$  at pH 8.5 and 7.5, respectively.

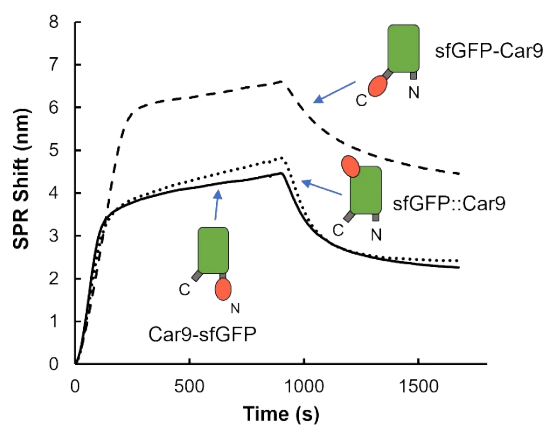

**Fig. S6** Influence of the Car9 insertion point on silica-binding affinity by monofunctional sfGFP derivatives. SPR sensorgrams were collected at pH 7.5, a protein concentration of 100  $\mu$ M, and a flowrate of 70  $\mu$ L/min using silica-coated chips and as described in reference 2. Equilibrium SPR shifts approximates protein coverage. A wash phase in which protein-free buffer is flowed over the chips starts at  $t = 900$ s.

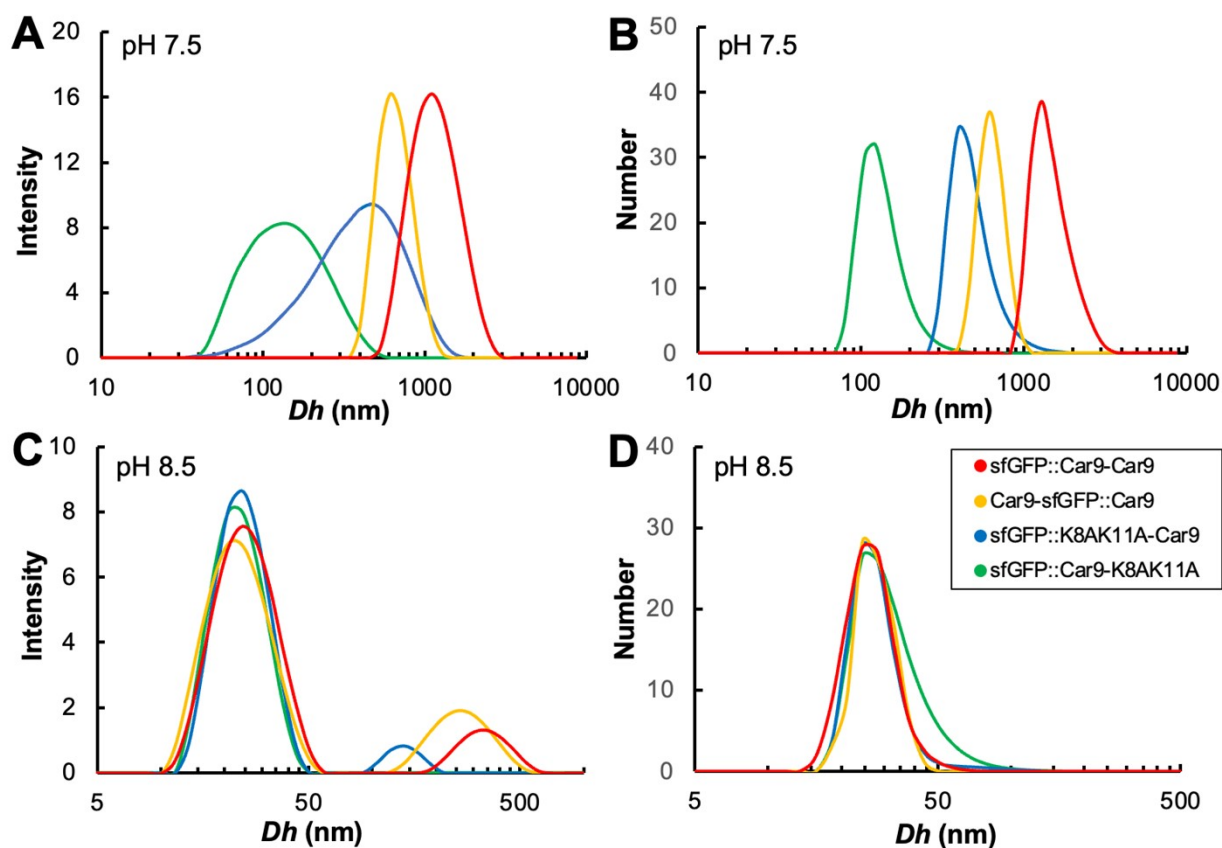

**Fig. S7** Size distributions based on scattering intensity (**A**, **C**) or particle numbers (**B**, **D**) were obtained by DLS upon mixing the indicated bifunctional sfGFP constructs with 10 nm SiNP at a 5:1 molar equivalent. Samples prepared at pH 7.5 (**A**, **B**), were shifted to pH 8.5 by addition of NaOH (**C**, **D**).

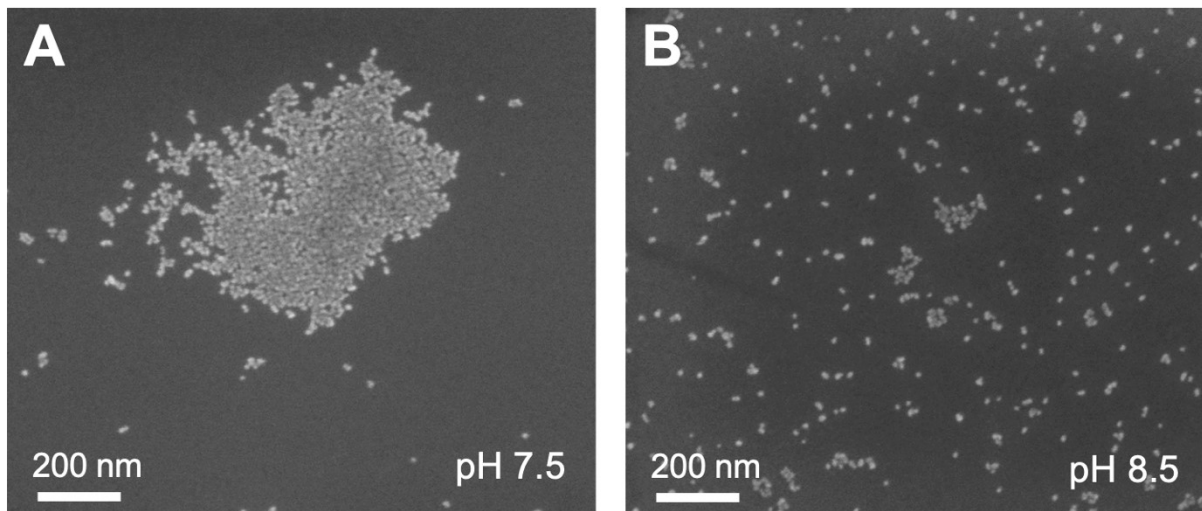

**Fig. S8** Representative SEM images of samples obtained upon mixing a 5:1 molar equivalent of sfGFP::Car9-K8AK11A with 10 nm SiNP at pH 7.5 (A) and following pH adjustment to 8.5 with NaOH (B).

**Table S1:** Mean hydrodynamic diameters ( $D_h$ ) and full width at half max (FWHM) values of major scattering intensity peaks. Samples were prepared with a 5:1 molar equivalent of sfGFP::Car9-Car9 to 10 nm SiNP at pH 7.5 in the presence of the indicated concentrations of NaCl or KCl. DLS data was collected at pH 7.5 and following pH adjustment to 8.5.

| Molarity<br>(mM) | pH 7.5             |              |                    |              | pH 8.5             |              |                    |              |
|------------------|--------------------|--------------|--------------------|--------------|--------------------|--------------|--------------------|--------------|
|                  | NaCl               |              | KCl                |              | NaCl               |              | KCl                |              |
|                  | Mean $D_h$<br>(nm) | FWHM<br>(nm) |
| 0                | 1210               | 1005         | 1210               | 1005         | 24                 | 20           | 24                 | 20           |
| 5                | 1340               | 950          | 1340               | 1032         | 44                 | 25           | 44                 | 32           |
| 10               | 1478               | 779          | 1524               | 1062         | 51                 | 35           | 54                 | 36           |
| 15               | 1718               | 1060         | 1940               | 1191         | 63                 | 33           | 98                 | 63           |
| 20               | 1963               | 1096         | 2335               | 1370         | 147                | 104          | 190                | 140          |
| 25               | 2480               | 1587         | 2688               | 1607         | 1280               | 380          | 1480               | 800          |
| 30               | 2868               | 1880         | 3261               | 2048         | 1990               | 950          | 2280               | 910          |

**Table S2:** Mean hydrodynamic diameters ( $D_h$ ) and full width at half max (FWHM) values extracted from scattering intensity and particle number size distributions. The indicated bifunctional sfGFP constructs were mixed with 10 nm SiNP at a 5:1 molar equivalent of proteins to nanoparticles and DLS data was collected at pH 7.5 and following pH adjustment to 8.5.

| Protein Name        | pH 7.5    |      |         |      | pH 8.5    |      |         |      |
|---------------------|-----------|------|---------|------|-----------|------|---------|------|
|                     | Intensity |      | Number  |      | Intensity |      | Number  |      |
|                     | Mean Dh   | FWHM | Mean Dh | FWHM | Mean Dh   | FWHM | Mean Dh | FWHM |
| sfGFP::Car9-Car9    | 1200      | 1006 | 1180    | 880  | 24        | 20   | 24      | 18   |
| sfGFP::Car9-K8AK11A | 150       | 126  | 143     | 73   | 23        | 18   | 23      | 21   |
| sfGFP::K8AK11A-Car9 | 450       | 335  | 438     | 310  | 24        | 19   | 24      | 17   |
| Car9-sfGFP::Car9    | 620       | 505  | 615     | 298  | 24        | 18   | 24      | 16   |

## References

- 1 X. Qi, Y. Zhao, K. Lachowski, J. Boese, Y. Cai, O. Dollar, B. Hellner, L. Pozzo, J. Pfaendtner, J. Chun, F. Baneyx and C. J. Mundy, *ACS Nano*, 2022, **16**, 1919–1928.
- 2 B. Hellner, S. Alamdari, H. Pyles, S. Zhang, A. Prakash, K. G. Sprenger, J. J. De Yoreo, D. Baker, J. Pfaendtner and F. Baneyx, *J. Am. Chem. Soc.*, 2020, **142**, 2355–2363.
